# 1 Separating an allele associated with 2 late flowering and slow maturation 3 of *Arabidopsis thaliana* from 4 population structure

5 Yanjun Zan<sup>1†</sup>, Xiao Feng<sup>2,3†</sup>, Zheng Ning<sup>3</sup>, Weilin Xu<sup>3,4</sup>, Qianhui Wan<sup>3,5</sup>,  
6 Dongyu Zeng<sup>6</sup>, Ziyi Zeng<sup>7</sup>, Yang Liu<sup>6\*</sup>, Xia Shen<sup>3,8†\*</sup>

**\*For correspondence:**

[xia.shen@ed.ac.uk](mailto:xia.shen@ed.ac.uk) (XS);  
[liuy353@mail.sysu.edu.cn](mailto:liuy353@mail.sysu.edu.cn) (YL)

†These authors contributed  
equally to this work

7 <sup>1</sup>Department of Medical Biochemistry and Microbiology, Uppsala  
8 University, Uppsala, Sweden; <sup>2</sup>State Key Laboratory of Biocontrol,  
9 Guangdong Provincial Key Laboratory of Plant Resources, Key Laboratory  
10 of Biodiversity Dynamics and Conservation of Guangdong Higher  
11 Education Institutes, School of Life Sciences, Sun Yat-Sen University,  
12 Guangzhou, China; <sup>3</sup>Department of Medical Epidemiology and  
13 Biostatistics, Karolinska Institutet, Stockholm, Sweden; <sup>4</sup>Department of  
14 Molecular Biology and Genetics, Cornell University, Ithaca, NY, USA;  
15 <sup>5</sup>Department of Mathematics, University of Wisconsin-Madison, Madison,  
16 Wisconsin, USA; <sup>6</sup>School of Life Sciences, Sun Yat-Sen University,  
17 Guangzhou, China; <sup>7</sup>School of Engineering, Sun Yat-Sen University,  
18 Guangzhou, China; <sup>8</sup>Center for Global Health Research, Usher Institute of  
19 Population Health Sciences and Informatics, University of Edinburgh,  
20 Edinburgh, Scotland, UK

---

22 **Abstract** Genome-wide association (GWA) analysis is a powerful tool to identify  
23 individual loci underlying the complex traits. However, application of GWAS in natural  
24 population comes with challenges, especially power loss due to population stratification.  
25 Here, we introduce a bivariate analysis approach to a public GWAS dataset of *Arabidopsis*  
26 *thaliana*. Using this powerful approach, a common allele, strongly confounded with  
27 population structure, is discovered to be associated with late flowering and slow

28 maturation of the plant. The discovered genetic effect on flowering time is further  
29 replicated in independent datasets. Using Mendelian randomization analysis based on  
30 summary associated statistics from our GWAS and expression QTL (eQTL) scans, we  
31 predicted and replicated a candidate gene *AT1G11560* that potentially causes this  
32 association. Further analysis with flowering-time-related genes indicates that this locus is  
33 also co-selected with many flowering-time-related genes. Our study demonstrates the  
34 efficiency of multi-phenotype analysis to uncover hidden genetic loci masked by  
35 population structure. The discovered pleiotropic genotype-phenotype map provides new  
36 insights into understanding the genetic correlation of complex traits.

37

---

## 38 Introduction

39 Evolution has resulted in the speciation and adaptation of various organisms. Although  
40 natural selection applies to all kinds of species, the resulted natural population structures  
41 have dramatic difference. Especially, due to their lack of mobility, plants, comparing to  
42 humans and most animals, have established much stronger population structure adaptive  
43 to specific climate conditions (Ch. 11 in *Crawley, 2009*). This makes it difficult, for instance  
44 in modern genomic studies, to distinguish genotypic effects on plants' phenotypes from  
45 geographical stratification (*Atwell et al., 2010*).

46 Fast-developing genotyping techniques have made genome-wide association study  
47 (GWAS) one of the most useful approaches for discovering genomic loci that regulate  
48 phenotypes in various organisms (*Hirschhorn and Daly, 2005; Atwell et al., 2010; Huang  
49 et al., 2010*). In human GWAS, we learnt that most of the discovered loci associated with  
50 complex traits or disease have very small effects (*Yang et al., 2010*). The detected single  
51 nucleotide polymorphisms (SNPs) need to have sufficiently high minor allele frequencies  
52 (MAFs) for the statistical tests to gain enough power, while high-MAF variants tend to have  
53 small effects on the studied phenotypes as these variants were under weak selection  
54 pressure. Alleles that have high penetrance on a phenotype are normally under strong  
55 selection, resulting in low MAFs of the corresponding SNPs. Thus, a major challenge in  
56 human GWAS appears to be the trade-off between statistical power and the effect size  
57 of the variant to detect (*Korte and Farlow, 2013; Yang et al., 2014; Wellenreuther and  
58 Hansson, 2016*).

59 Although similar trade-off also applies to GWAS in plant populations, e.g. in the natural  
60 population of *Arabidopsis thaliana*, in terms of discovery power, the major challenge is dif-  
61 ferent. As each individual plant accession is sampled from a specific geographical location  
62 in the world, accessions with different genotypes normally have much greater phenotypic

63 differences compared to those in humans. It appears that the genome can explain a  
64 large proportion of variation in the plant phenotype, however, the population structure in  
65 nature makes such a genomic effect heavily confounded with the environmental effect  
66 due to geographical stratification. Therefore, there can be a number of alleles, who have  
67 large genetic effects on a certain phenotype, but masked by the population structure.

68 As a community based effort, over 1000 natural *A. thaliana* accessions have been col-  
69 lected from worldwide geographical locations (**1001 Genomes Consortium, 2016; Kawakatsu**  
70 **et al., 2016**). Most of those plants have been sequenced for genome, transcriptome, and  
71 even methylome, and these datasets have been made publicly available for worldwide  
72 researchers. Many accessions in this collection have been phenotyped for developmen-  
73 tal, metabolic, inomics, stress resistance traits (**Atwell et al., 2010**), and more and more  
74 phenotypes are gradually releasing. Previous analysis in those datasets have revealed  
75 substantial connections between genotypic and phenotypic variations in this species. The  
76 application of association mapping have provided insights to the genetic basis of complex  
77 traits (**Atwell et al., 2010; Shen et al., 2012; Wang et al., 2017**), adaptation (**Shen et al.,**  
78 **2014**) and evolutionary process. Nevertheless, many essential genotype-phenotype links  
79 are still difficult to establish based on the current GWAS data, due to the substantial pop-  
80 ulation stratification highly correlated with the sampling origins of the plants. Therefore,  
81 novel powerful analyses are required to further uncover hidden genetic regulation.

82 Based on publicly available *A. thaliana* datasets (**Atwell et al., 2010; Schmitz et al., 2013;**  
83 **1001 Genomes Consortium, 2016; Kawakatsu et al., 2016**), here, we aim to use a bivariate  
84 analysis method that combines the discovery power of two correlated phenotypes (**Shen**  
85 **et al., 2017**), in order to map novel pleiotropic loci that simultaneously regulate both traits.  
86 We interpret the statistical significance with a double-trait genotype-phenotype map. We  
87 try to replicate and *in silico* functionally investigate the candidate genes that may drive  
88 such associations.

## 89 RESULTS

### 90 **Bivariate genomic scan identifies a hidden locus simultaneously as-** 91 **sociated with flowering and maturation periods**

92 We re-analyzed a public dataset of a natural *A. thaliana* collection, where 43 developmental  
93 phenotypes and 23 flowering-time-related phenotypes were previously published (**Atwell**  
94 **et al., 2010**). The number of accessions with measured phenotypes varies from 93 to  
95 193 with a median of 147 (Supplementary Table 1). We first excluded all variants with  
96 minor allele frequencies (MAF) less than 0.1 and performed single-trait GWA analysis for  
97 all these traits based on a linear mixed model, so that the confounded genetic effects due

98 to population stratification is adjusted. We then applied our recently developed multi-trait  
99 GWAS method (*Shen et al., 2017*) to all pairwise combination of the phenotypes (Materials  
100 & Methods). One novel locus, in one of the pairwise test, reached the most stringent 5%  
101 Bonferroni-corrected genome-wide significance threshold for the 2,145 pairs of traits and  
102 173,220 variants, i.e.  $p < 1.35 \times 10^{-10}$  (Table 1, Fig. 1a). This signal also reaches single-trait  
103 genome-wide significance in other six pairs of traits highly correlated with the top pair  
104 (Supplementary Fig. 1), without Bonferroni-correction for the number of tested trait pairs  
105 (Table 1, Supplementary Fig. 3-8).

106 For the most significant trait combination, 2W (days to flowering time under long day  
107 with vernalized for 2 weeks) and MT GH (maturation period), the linkage disequilibrium  
108 (LD) block of this locus (LD  $r > 0.7$ ) covers about a 260 kb interval on chromosome 1, with  
109 a top variant at 3,906,923 bp (double-trait  $p = 9.9 \times 10^{-12}$ , Fig. 1b, Table 1). The detected  
110 locus shows joint effects on flowering and maturation, where the effect on flowering  
111 time (2W) is notably large (15.3 days), and that on maturation period (MT GH) is 2.5 days  
112 (Table 1). These correspond to narrow-sense heritability values of 24% and 10% of the  
113 two phenotypes, respectively.

114 [TABLE 1 ABOUT HERE]

115 [FIGURE 1 ABOUT HERE]

## 116 **Double-trait analysis is sufficiently powerful to overcome the con-** 117 **founding population structure**

118 The detected joint-effect locus was missed in the corresponding single-trait GWA analysis  
119 of 2W (effect = 15.3,  $p = 2.26 \times 10^{-5}$  after correcting for population stratification) and that  
120 of MT GH (effect = 2.5,  $p = 3.70 \times 10^{-5}$ ). Notably, this locus was not even detectable at  
121 the genome-wide significance level in a much larger population of more than 1,000 *A.*  
122 *thaliana* accessions (*Kawakatsu et al., 2016; 1001 Genomes Consortium, 2016*) due to its  
123 severe confounding with the natural population structure. The statistical significance  
124 can only be identified when considering the joint distribution of the bivariate statistic.  
125 According to the genome-wide Z-scores (student t-statistics), these two phenotypes are  
126 negatively correlated, as the plant's lifespan is relatively stable (estimated and observed  
127 phenotypic correlation = -0.55 and -0.68, respectively). However, the observed effects on  
128 the two traits are both substantially positive, showing sufficient deviation from the joint  
129 distribution that led to bivariate statistical significance (Fig. 2).

130 [FIGURE 2 ABOUT HERE]

131 The strong confounding with the population structure can also be visualized by the  
132 allele frequency distribution of the top associated SNP across different *A. thaliana* sub-

133 populations based on the genome re-sequencing data from the *A. thaliana* 1001-genomes  
134 project (**1001 Genomes Consortium, 2016**, Fig. 3). The sub-populations were divided by  
135 admixture analysis using ADMIXTURE (**1001 Genomes Consortium, 2016; Alexander et al.,**  
136 **2009**). The plus allele increasing flowering time was predominantly found in Sweden  
137 and almost fixed in the Northern Sweden population (Fig. 3b; allele frequency = 0.97 in  
138 Northern Sweden and 0.51 in Southern Sweden). Overall, the phenotype, e.g. flowering  
139 time at 10 °C, highly correlates with the frequency of the plus allele (Fig. 3). The genotype  
140 at this locus follows a latitude decline, where the northern accessions are enriched with  
141 the plus allele and the southern accessions are enriched with the minus allele (Fig. 3). This  
142 spatially imbalanced enrichment shows strong confounding with the population structure,  
143 which is why standard single-trait GWAS loses power substantially.

144 [FIGURE 3 ABOUT HERE]

### 145 **Replication of the detected genetic effect on flowering time**

146 Although we are lack of an independent dataset of *A. thaliana* maturation duration  
147 to replicate the bivariate statistical test, datasets containing additional independent *A.*  
148 *thaliana* flowering time measurements are available. We downloaded a flowering time  
149 GWAS dataset measured in 1,135 natural accessions from the 1001-genomes project  
150 collection (**1001 Genomes Consortium, 2016**) and performed a single-trait association  
151 analysis of our discovered top SNP with linear mixed model correction for the population  
152 structure. The genetic effect was significantly replicated for flowering time at 10 °C (effect  
153 = 1.7 days,  $p = 0.037$ ) and flowering time at 16 °C (effect = 3.6 days,  $p = 0.003$ ). The effects  
154 on flowering time in the replication sample appear to be smaller than in the discovery  
155 population, possibly due to Winner's curse in the discovery phase.

156 We also screened literature for conventional quantitative trait loci (QTL) studies in  
157 intercrosses using natural *A. thaliana* accessions. Our detected signal is underneath a  
158 reported QTL peak for flowering time from an intercross between a Swedish and an  
159 Italian accession (**Dittmar et al., 2014**, Supplementary Fig. 2). This, together with the  
160 replication above, justifies the detected association. Although the discovered genetic  
161 effect on maturation period is not directly replicated, the effect does exists when the effect  
162 on flowering is justified, as the pleiotropic signal must be driven by both phenotypes.

### 163 **Prediction and replication of candidate genes using summary-level** 164 **Mendelian randomization**

165 As a community-based effort, all the natural *A. thaliana* accessions from the 1001-genomes  
166 project were measured for their transcriptome (**Kawakatsu et al., 2016; 1001 Genomes**  
167 **Consortium, 2016**). Such a public gene expression dataset allows us to predict candidate

168 genes underlying the association signal. We extracted the expression levels of 19 genes  
169 within a  $\pm$  20kb window around the top associated SNP using RNA-seq gene expression  
170 measurements from 140 accessions (*Schmitz et al., 2013*). Among these, the distributions  
171 of 14 gene expression phenotypes significantly deviate from normality (Kolmogorov-  
172 Smirnov test statistic  $> 0.8$ ), and these genes were filtered out due to potential unreliable  
173 measurements (*Zan et al., 2016*). The remaining 5 genes were passed onto eQTL mapping  
174 at the discovered locus (Materials & Methods).

175 Based on the locus-specific eQTL mapping summary statistics, we applied the recently  
176 developed Summary-level Mendelian randomization (SMR) method (*Zhu et al., 2016*)  
177 to predict potential candidate genes among these five genes. The analysis integrates  
178 summary association statistics from GWAS and eQTL scan to predict functional candidate  
179 genes using multiple-instrument Mendelian randomization (*Burgess et al., 2015*), where  
180 the complementary Heterogeneity In Dependent Instruments (HEIDI) test checks that  
181 the gene expression and flowering time share the same underlying causal variant. One  
182 significant candidate *AT1G11560* was detected after Bonferroni correction for five tests (Fig.  
183 4, Table 2). This candidate gene prediction result was also replicated using an independent  
184 eQTL mapping dataset (*Kawakatsu et al., 2016*).

185 [TABLE 2 ABOUT HERE]

186 [FIGURE 4 ABOUT HERE]

### 187 **Indication of co-selection with genes in flowering-related pathways**

188 As flowering time is a well-known polygenic trait, we expect multiple loci to be involved  
189 and possibly co-selected as a result of parallel evolution. Therefore, we explored the  
190 evidence of co-selection by associating the expression values of 288 known genes in  
191 flowering-time-related pathways and 1 gene in the maturation related pathway with  
192 our top SNP using transcriptome data from 648 *A. thaliana* accessions (*1001 Genomes*  
193 *Consortium, 2016*, Materials & Methods). In total, six genes (*NF-YA8, AT5G53360, SPL15,*  
194 *AGL42, FLC, AGL20*) were associated with our top SNP (false discovery rate  $< 0.05$ ), where,  
195 conservatively, four genes (*AT5G53360, AGL42, FLC, AGL20*) were replicated after Bonferroni  
196 correction for six tests using data from an independent collection of 140 *A. thaliana*  
197 (*Schmitz et al., 2013*, Table 3). This indicates that co-selected genes in multiple pathways  
198 determine the flowering time variation in nature, and our detected locus contributes to a  
199 part of that.

200 [TABLE 3 ABOUT HERE]

## DISCUSSION

A serious issue of GWAS in natural population is the confounding between true underlying genetic effects and the population structure, which can lead to spurious associations between genotypes and phenotypes if population stratification is not properly adjusted (*Korte and Farlow, 2013; Yang et al., 2014; Wellenreuther and Hansson, 2016*). Incorporation of the random polygenic effect using linear mixed models can effectively control the population structure, but such correction often compromises the true signals. Here, we applied a bivariate analysis to a classic dataset and successfully separated a locus from strong population structure. The detected allele is associated with late flowering and slow maturation of *A. thaliana*, which was corrected away by the linear mixed model in standard single-trait analysis. The replication of the genetic effect on flowering time in an old intercross linkage analysis and another independent dataset improves the confidence of this association. The discovered association is a typical example that jointly modeling phenotypes that share genetic basis can boost discovery power and reveal pleiotropic genotype-phenotype map at the same time.

Together with our recent application of multivariate analysis in human isolated populations (*Shen et al., 2017*), the results further indicate that multi-phenotype analysis is an effective approach to detect hidden loci that are lack of discovery power in single-phenotype analysis thus is worth testing in broader applications. Multivariate analysis appears to have the greatest power when the locus-specific genetic correlation does not agree with the natural phenotypic correlation. For instance, like the discovery here, for two traits that are negatively correlated, loci that generate positive genetic correlation between the traits tend to have good chance to be detected in a joint analysis.

In GWAS, phenotypes are usually chosen based on morphological, physiological or economical features. Those features are usually feasible and simple to quantify; however, they might not be directly representative for the underlying genetic or biological factor that we try to detect. Fortunately, a certain degree of biological pathway sharing among complex traits is common, i.e. pleiotropy (*Visscher and Yang, 2016*). Nowadays, it is very common that multiple phenotypes are measured for same individuals in many GWAS datasets, especially in omics study where thousands of phenotypes are measured. Instead of focusing on one phenotype at a time, it is of essential value to jointly model multiple phenotypes, attempting to detect pleiotropic loci that affect multiple traits with biological relevance.

In this study, all the pairs of traits that are associated with the detected locus contain at least one flowering-time trait, and nearly all of them have maturation duration involved. Detection of the novel locus in a bivariate analysis indicates shared genetic basis for the two types of developmental traits, which measure the lengths of two important

238 period during the plant's life time. By integrating the expression level information and  
239 GWAS result using SMR/HEIDI test, we were able to predict candidate genes in this region.  
240 However, further work beyond the scope of this paper is still required to establish the  
241 molecular biological basis underlying the replicate association.

242 Many genetic variants affecting flowering time have been mapped and many genes  
243 promoting flowering times have been well characterized using standard lab accession,  
244 Col-0 (*Brachi et al., 2010*). Unlike simple traits, where only one or a few alleles are  
245 driving the trait's variation, there are many more variants throughout the genome that  
246 contribute to the variation of flowering time. The associations between our top SNP and  
247 the expression of many flowering-time-related genes serve as evidence of co-selection or  
248 parallel adaptation.

249 In conclusion, our study demonstrates the efficiency of joint modeling multiple-  
250 phenotypes which overcomes severe power loss due to population stratification in associ-  
251 ation studies. We discover and replicate a pleiotropic allele that regulate flowering and  
252 maturation periods simultaneously, providing novel insights in understanding the plant's  
253 development over life time. By integrating gene expression information with the GWAS  
254 results, we predict a functional candidate underneath the associated genomic region.  
255 Analysis of gene expression with other flowering-time-related genes show evidence of  
256 co-selection of the predicted candidate with many genes in flowering-time pathways.  
257 We encourage wider applications of such a multivariate framework in future analyses of  
258 genomic data.

## 259 **Acknowledgements**

260 X.S. was in receipt of a Swedish Research Council (VR) grant (No. 537-2014-371). Interna-  
261 tional collaboration within this work was partly supported by the Swedish Foundation for  
262 International Cooperation in Research and Higher Education (STINT) initiation grant to X.S.  
263 (No. IB2015-6000) and Karolinska Institutet travel grant (No. 2017-00534).

## 264 **Author contributions**

265 X.S. initiated and coordinated the study. Y.Z. and X.F. performed the main data analysis.  
266 Z.N. and X.S. contributed to statistical modeling and interpretation. W.X., Q.W., D.Z. and  
267 Z.Z. contributed to data processing. Y.Z., X.F. and X.S. wrote the manuscript. Y.L. and X.S.  
268 supervised the study.

## 269 **Competing interests statement**

270 The authors declare no competing financial interests.



## 271 Figure legends

### 272 **Figure 1: Bivariate genome-wide association analysis of two developmental trait.**

273 2W: Days to flowering time (FT) under long day (LD) with vernalized for 2 wks at 5°C,  
274 8hrs daylight, MT GH: Maturation period. (a) Manhattan plots comparison of bivariate  
275 and univariate analysis results, where the novel variants only discoverable when com-  
276 bining two phenotypes are shown in green. The horizontal dashed line represents a 5%  
277 Bonferroni-corrected genome-wide significant threshold for the number of variants and  
278 also the number of tested trait pairs, respectively. (b) Zooming in the novel locus detected  
279 using bivariate analysis.  $r$ : linkage disequilibrium measured as correlation coefficient  
280 between the top variant and each variant in the region. .

### 281 **Figure 2: Hexbin scatter plot comparing all Z-scores of the two traits across the**

282 **genome, showing the bivariate statistical significance of the detected locus.** The  
283 top variants of the locus is marked on the edge of the empirical bivariate normal distribu-  
284 tion with a red circle. The black line with a slope of -1 is provided as a visual guide.

### 285 **Figure 3: a) Flowering time variation (10°C) among different sub-populations of *Ara-***

286 *bidopsis thaliana*. These populations are divided by admixture analysis (**1001 Genomes**  
287 **Consortium, 2016**); b) Frequency of the top associated SNP at chromosome 1, 3,906,923  
288 bp in different sub-populations. The association between the structure of the phenotype  
289 and that of the allele frequency shows the population confounding at this locus.

### 290 **Figure 4: Prioritized candidate genes at the detected locus for flowering time using**

291 **SMR analysis.** a) Manhattan plot of association between flowering time at 10°C and SNPs  
292 around 40kb of top associated SNP in bivariate analysis. The diamonds highlight top eQTL  
293 for individual genes; b) Manhattan plot of association between expression of *AT1G11560*  
294 and SNPs around 40kb of top associated SNP in bivariate analysis. Genes tested in SMR  
295 analysis are highlighted using arrows; c) Similar linkage-disequilibrium structure at the  
296 locus for the corresponding populations of GWA and eQTL analyses.

## Tables

**Table 1: Discovery and replication analyses results for the novel pleiotropic locus.**

Reported association statistics are for the top variant at the locus for each pair of traits.

<sup>1</sup>LD: Days to flowering time under Long Day. <sup>2</sup>OW: Days to flowering time under long day without vernalization. <sup>3</sup>2W: Days to flowering time under long day with vernalized for 2 weeks at 5°C, 8hrs daylight. <sup>4</sup>4W: Days to flowering time under long day with vernalized for 4 weeks at 5°C, 8 hrs daylight. <sup>5</sup>OW GH FT: Days to flowering time (greenhouse). <sup>6</sup>FT GH: Days to flowering (greenhouse). <sup>7</sup>MT GH: Maturation period (greenhouse), 20°C, 16 hrs daylight. <sup>8</sup>RP GH: Reproduction period (greenhouse), 20°C, 16 hrs daylight. <sup>9</sup>RA: Reference allele. <sup>10</sup>EA: Effect allele. <sup>11</sup>MAF: Minor allele frequency. <sup>12</sup>Correlation refers to observed phenotypic correlation. <sup>13</sup>FT: Flowering time.

| <i>Double-trait Analysis</i> |                    |     |          |                 |                  |                   |                       |                           |  |
|------------------------------|--------------------|-----|----------|-----------------|------------------|-------------------|-----------------------|---------------------------|--|
| Trait 1                      | Trait 2            | Chr | Position | RA <sup>9</sup> | EA <sup>10</sup> | MAF <sup>11</sup> | <i>P</i>              | Correlation <sup>12</sup> |  |
| LD <sup>1</sup>              | MT GH <sup>7</sup> | 1   | 3904658  | T               | A                | 0.20              | 6.3×10 <sup>-9</sup>  | -0.39                     |  |
| OW <sup>2</sup>              | MT GH <sup>7</sup> | 1   | 3896072  | G               | T                | 0.20              | 8.4×10 <sup>-9</sup>  | -0.58                     |  |
| 2W <sup>3</sup>              | MT GH <sup>7</sup> | 1   | 3906923  | T               | C                | 0.22              | 9.9×10 <sup>-12</sup> | -0.68                     |  |
| 2W <sup>3</sup>              | RP GH <sup>8</sup> | 1   | 3978064  | A               | C                | 0.27              | 1.3×10 <sup>-8</sup>  | -0.17                     |  |
| 4W <sup>4</sup>              | MT GH <sup>7</sup> | 1   | 3906923  | T               | C                | 0.22              | 3.1×10 <sup>-9</sup>  | -0.64                     |  |
| OW GH FT <sup>5</sup>        | MT GH <sup>7</sup> | 1   | 3906923  | T               | C                | 0.22              | 1.8×10 <sup>-8</sup>  | -0.36                     |  |
| FT GH <sup>6</sup>           | MT GH <sup>7</sup> | 1   | 3896072  | G               | T                | 0.20              | 1.5×10 <sup>-8</sup>  | -0.60                     |  |

  

| <i>Single-trait Analysis</i> |                      |                       |         |                      |                       | <i>Replication</i>    |                      |                       |                      |
|------------------------------|----------------------|-----------------------|---------|----------------------|-----------------------|-----------------------|----------------------|-----------------------|----------------------|
| Trait 1                      |                      |                       | Trait 2 |                      |                       | FT <sup>13</sup> 10°C |                      | FT <sup>13</sup> 16°C |                      |
| Effect                       | <i>P</i>             | <i>h</i> <sup>2</sup> | Effect  | <i>P</i>             | <i>h</i> <sup>2</sup> | Effect                | <i>P</i>             | Effect                | <i>P</i>             |
| 33.5                         | 5.6×10 <sup>-6</sup> | 0.22                  | 2.42    | 6.0×10 <sup>-4</sup> | 0.07                  | 2.26                  | 1.0×10 <sup>-2</sup> | 4.45                  | 4.9×10 <sup>-4</sup> |
| 17.3                         | 1.6×10 <sup>-4</sup> | 0.17                  | 2.59    | 2.1×10 <sup>-4</sup> | 0.09                  | 1.95                  | 2.3×10 <sup>-2</sup> | 3.96                  | 1.5×10 <sup>-3</sup> |
| 15.3                         | 2.3×10 <sup>-5</sup> | 0.24                  | 2.47    | 3.7×10 <sup>-5</sup> | 0.10                  | 1.72                  | 3.7×10 <sup>-2</sup> | 3.56                  | 3.0×10 <sup>-3</sup> |
| 19.7                         | 6.8×10 <sup>-7</sup> | 0.26                  | 2.65    | 1.6×10 <sup>-3</sup> | 0.06                  | 1.57                  | 5.6×10 <sup>-2</sup> | 2.57                  | 3.4×10 <sup>-2</sup> |
| 11.6                         | 1.7×10 <sup>-3</sup> | 0.16                  | 2.47    | 3.7×10 <sup>-5</sup> | 0.10                  | 1.72                  | 3.7×10 <sup>-2</sup> | 3.56                  | 3.0×10 <sup>-3</sup> |
| 25.8                         | 3.8×10 <sup>-5</sup> | 0.21                  | 2.47    | 3.7×10 <sup>-5</sup> | 0.10                  | 1.72                  | 3.7×10 <sup>-2</sup> | 3.56                  | 3.0×10 <sup>-3</sup> |
| 14.9                         | 1.8×10 <sup>-3</sup> | 0.11                  | 2.59    | 2.1×10 <sup>-4</sup> | 0.09                  | 1.95                  | 2.3×10 <sup>-2</sup> | 3.96                  | 1.5×10 <sup>-3</sup> |

316 **Table 2: Summary of the SMR/HEIDI analysis results.** <sup>1</sup>Top SNP: The top SNP in ex-  
 317 pression QTL analysis. <sup>2</sup>MAF: Minor allele frequency of the top associated SNP. <sup>3</sup> $P_{SMR}$ :  
 318 p-value from SMR using a collection of 140 *A. thaliana* accessions. <sup>4</sup> $P_{HEIDI}$ : p-value from  
 319 HEIDI test using a collection of 140 *A. thaliana*. <sup>5</sup> $P_{SMR}$ : p-value from SMR using a second  
 320 collection of 648 accessions. <sup>6</sup> $P_{HEIDI}$ : p-value from HEIDI test using a second collection of  
 321 648 accessions.

| Gene             | Top SNP <sup>1</sup> | MAF <sup>2</sup> | $P_{SMR}^3$          | $P_{HEIDI}^4$        | $P_{SMR}^5$          | $P_{HEIDI}^6$        |
|------------------|----------------------|------------------|----------------------|----------------------|----------------------|----------------------|
| <i>AT1G11560</i> | Chr1:3881093         | 0.34             | $6.8 \times 10^{-3}$ | $4.8 \times 10^{-1}$ | $3.2 \times 10^{-2}$ | $2.6 \times 10^{-1}$ |
| <i>AT1G11655</i> | Chr1:3874970         | 0.39             | $4.1 \times 10^{-2}$ | $9.7 \times 10^{-2}$ | $5.9 \times 10^{-1}$ | NA                   |
| <i>AT1G11690</i> | Chr1:4299126         | 0.04             | $3.7 \times 10^{-1}$ | NA                   | $9.4 \times 10^{-1}$ | NA                   |
| <i>AT1G11590</i> | Chr1:3716355         | 0.11             | $5.0 \times 10^{-1}$ | NA                   | $2.2 \times 10^{-2}$ | $1.5 \times 10^{-1}$ |
| <i>AT1G11482</i> | Chr1:3830013         | 0.63             | $8.2 \times 10^{-1}$ | NA                   | $1.5 \times 10^{-1}$ | NA                   |

325 **Table 3: Genes in flowering-time pathways whose expression are associated with**  
 326 **the detected locus.** <sup>1</sup>p-value from a expression dataset generated from 648 accessions  
 327 in the *A. thaliana* 1001-genomes project (*Kawakatsu et al., 2016*). <sup>2</sup>FDR value computed  
 328 from p-value<sup>1</sup>. <sup>3</sup>Replication p-value from another subset of 140 accessions (*Schmitz et al.,*  
 329 *2013*).

| Locus ID  | Gene Name        | p-value <sup>1</sup> | q-value <sup>2</sup> | Replication p-value <sup>3</sup> |
|-----------|------------------|----------------------|----------------------|----------------------------------|
| AT1G17590 | <i>NF-YA8</i>    | $1.6 \times 10^{-7}$ | $2.3 \times 10^{-5}$ | $1.7 \times 10^{-2}$             |
| AT5G53360 | <i>AT5G53360</i> | $5.8 \times 10^{-7}$ | $5.7 \times 10^{-5}$ | $3.2 \times 10^{-4}$             |
| AT3G57920 | <i>SPL15</i>     | $7.9 \times 10^{-4}$ | $7.8 \times 10^{-3}$ | $1.7 \times 10^{-2}$             |
| AT5G62165 | <i>AGL42</i>     | $1.2 \times 10^{-3}$ | $1.1 \times 10^{-2}$ | $6.3 \times 10^{-3}$             |
| AT5G10140 | <i>FLC</i>       | $1.5 \times 10^{-3}$ | $1.3 \times 10^{-2}$ | $5.7 \times 10^{-4}$             |
| AT2G45660 | <i>AGL20</i>     | $1.8 \times 10^{-3}$ | $1.4 \times 10^{-2}$ | $1.2 \times 10^{-3}$             |

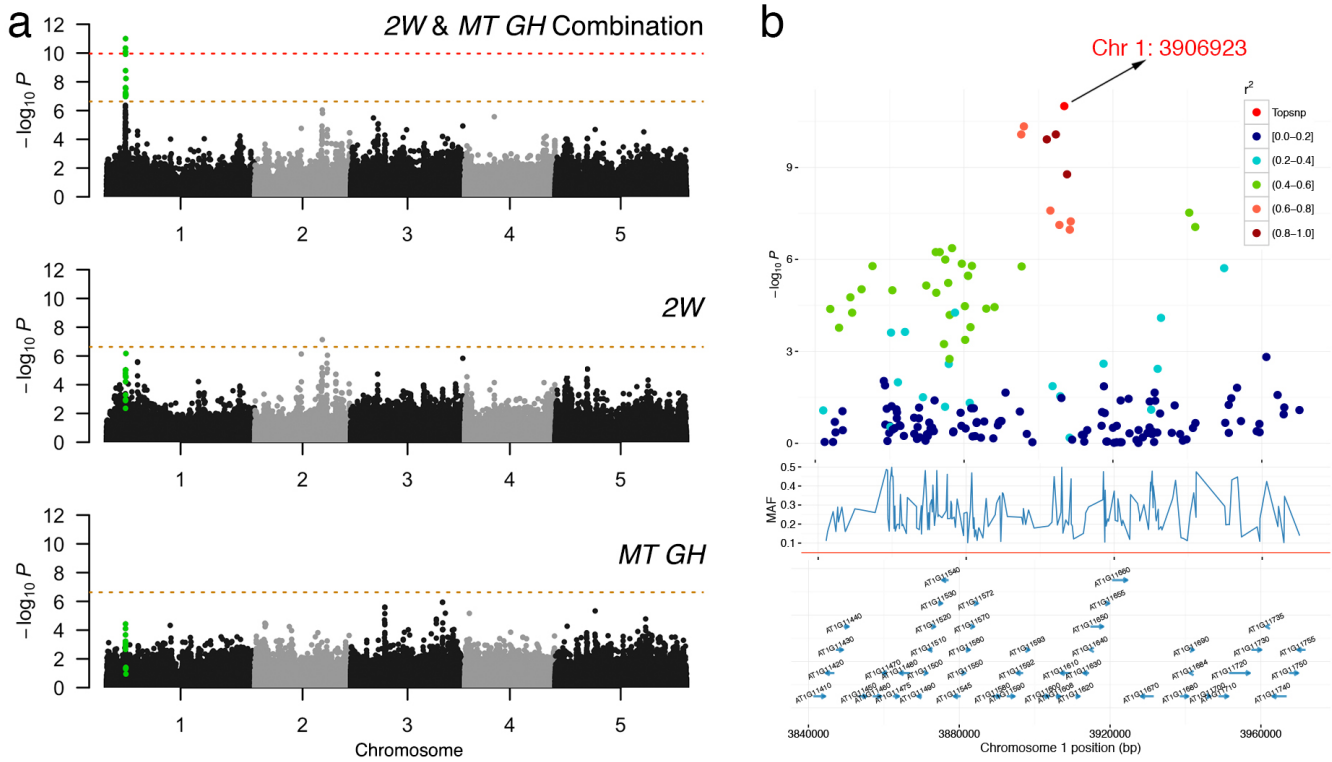

332 Figure 1

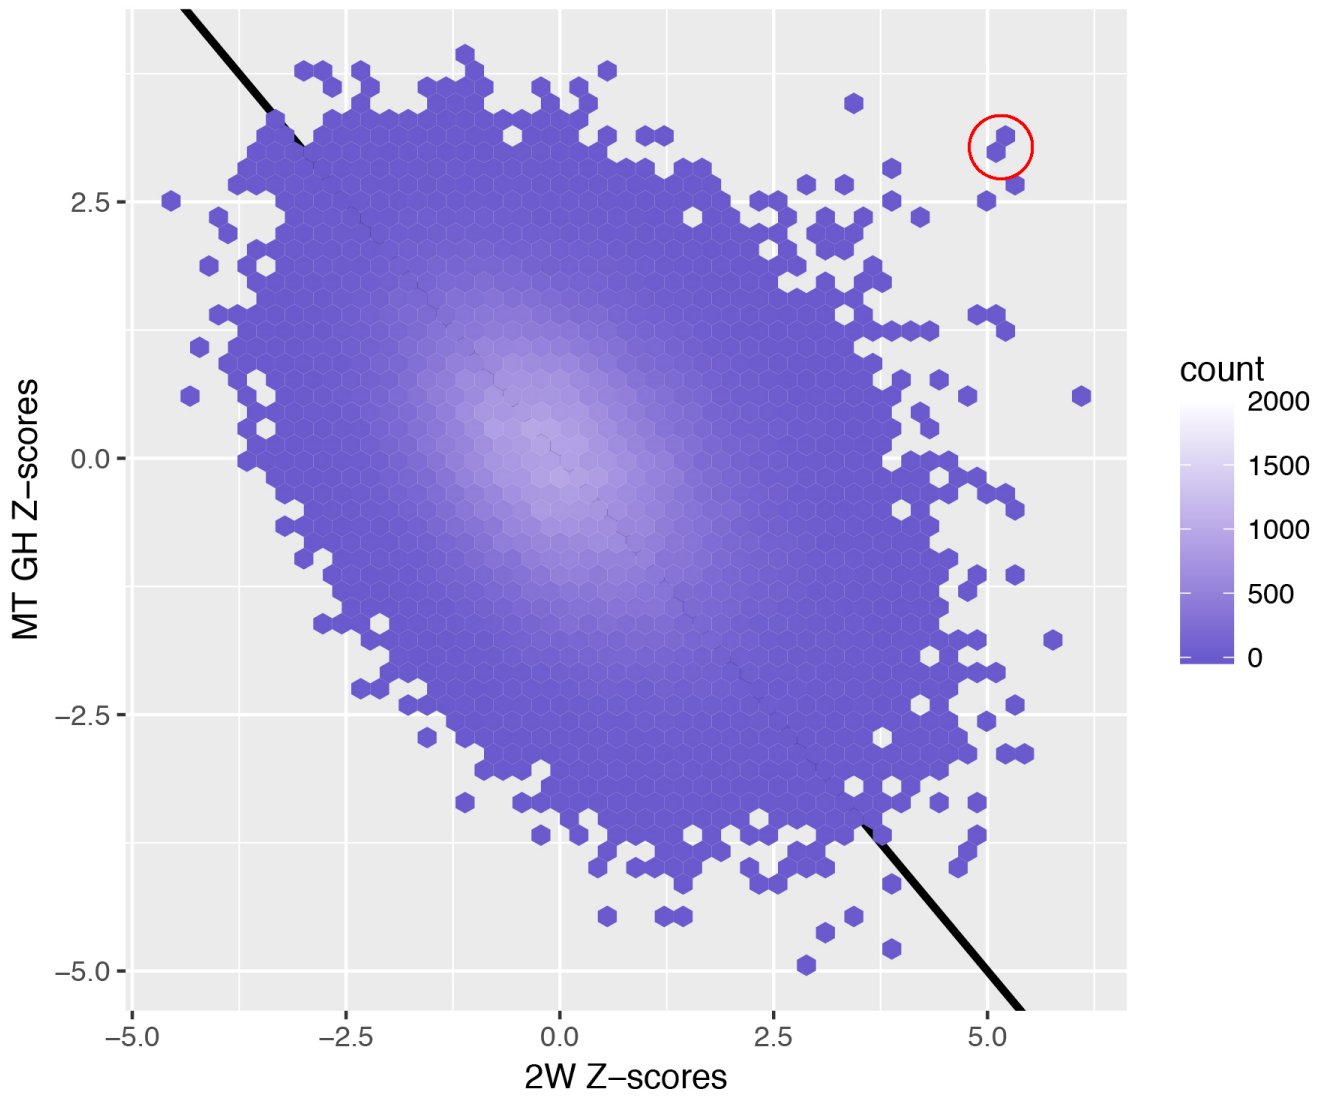

333 Figure 2

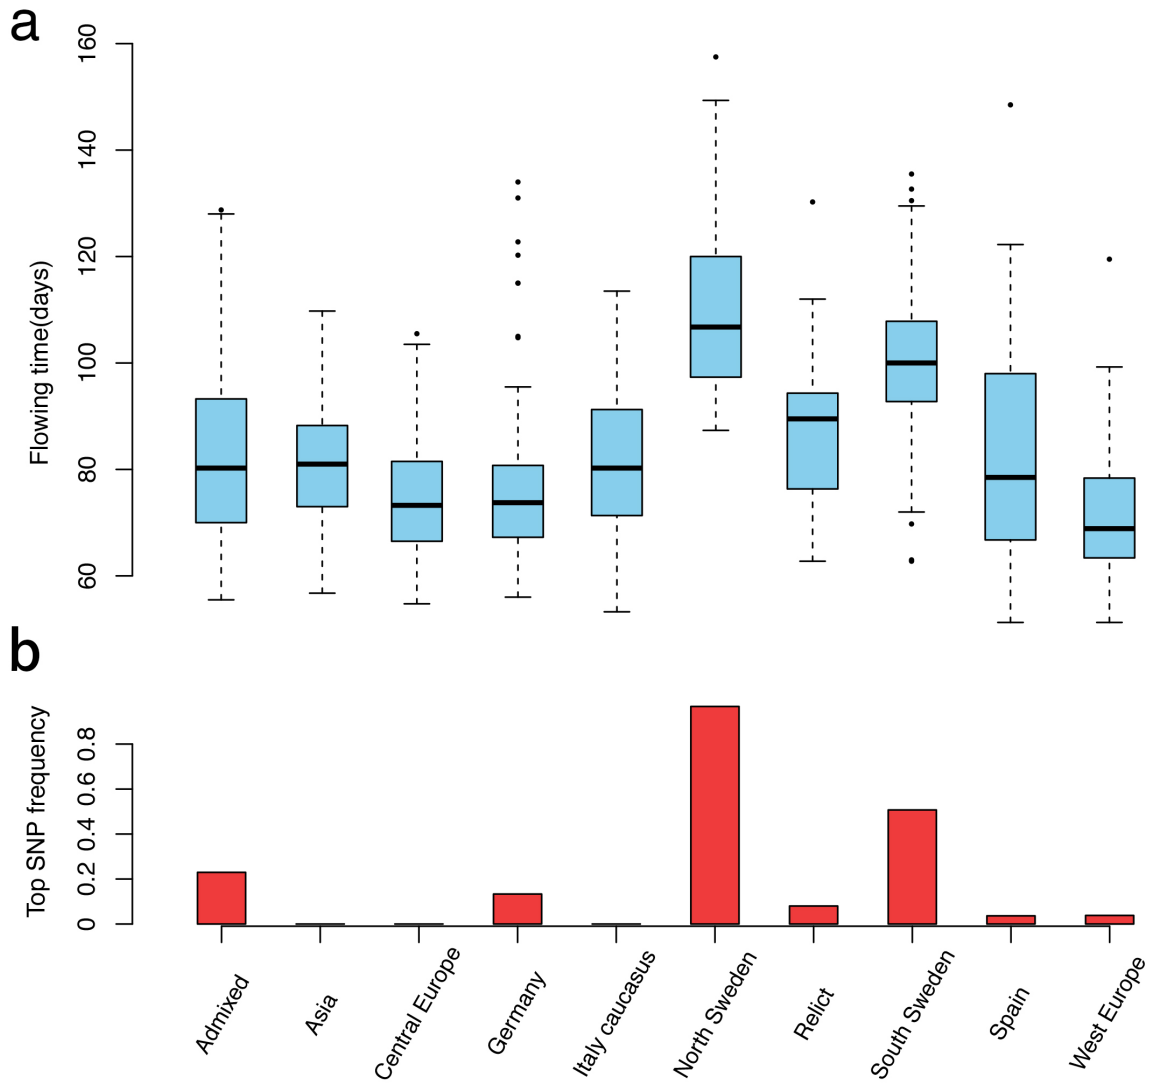

334 Figure 3

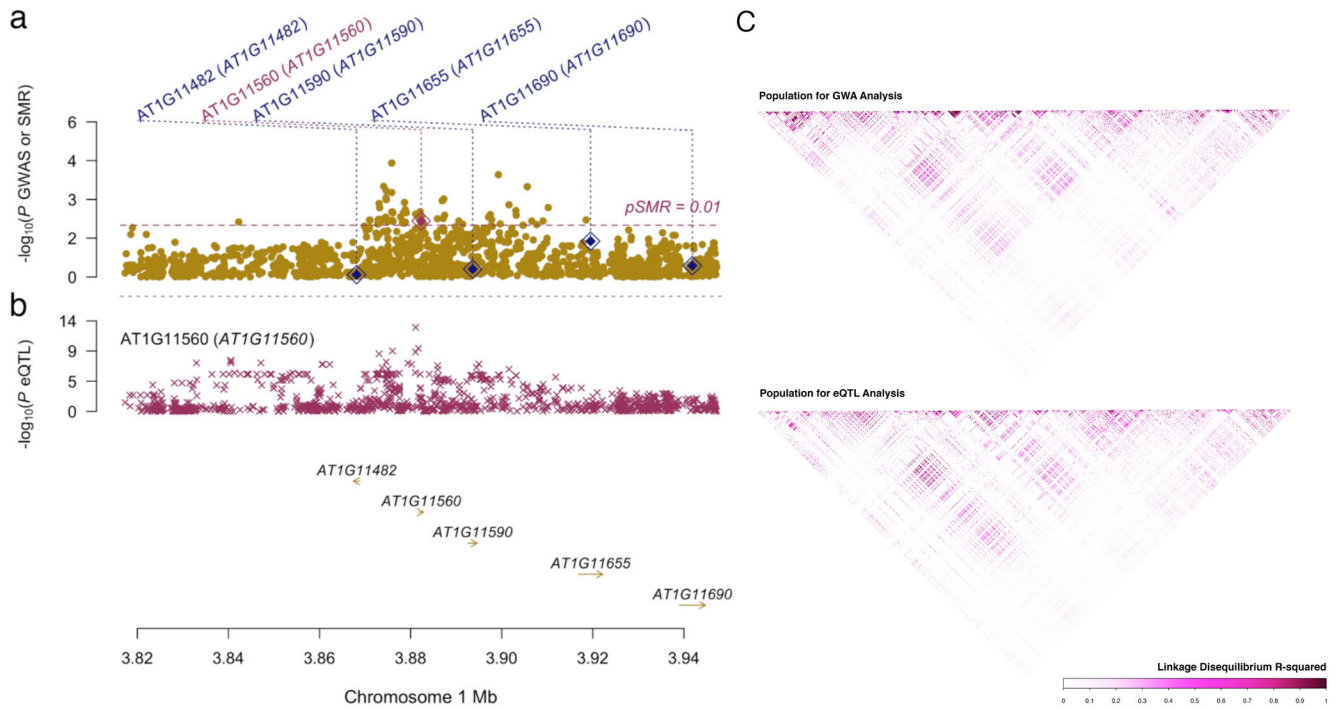

335 Figure 4

## 336 MATERIALS & METHODS

### 337 **Genome-wide 250k SNP array genotype data and phenotype data for** 338 **199 natural *Arabidopsis thaliana* accessions**

339 We downloaded a public dataset on collection of 199 natural *Arabidopsis thaliana* inbred  
340 lines contains 107 phenotypes and corresponding genotypes (*Atwell et al., 2010*). Those  
341 files are publicly available at [https://github.com/Gregor-Mendel-Institute/atpolydb/blob/master/miscellaneous\\_data/phenotype\\_published\\_raw.tsv](https://github.com/Gregor-Mendel-Institute/atpolydb/blob/master/miscellaneous_data/phenotype_published_raw.tsv), and [https://github.com/Gregor-Mendel-Institute/atpolydb/blob/master/250k\\_snp\\_data/call\\_method\\_75.tar.gz](https://github.com/Gregor-Mendel-Institute/atpolydb/blob/master/250k_snp_data/call_method_75.tar.gz). 214,051 SNPs were avail-  
342 able. After filtering out the variants with minor allele frequency less than 0.10, 173,220  
343 SNPs remained.  
344  
345

### 346 **Whole genome re-sequencing and RNA-seq data for a population of** 347 **1,135 natural *A. thaliana* accessions**

348 1,135 natural *Arabidopsis thaliana* accessions have been collected and sequenced for the  
349 whole genome and transcriptome (*1001 Genomes Consortium, 2016; Kawakatsu et al.,*  
350 *2016*). We downloaded this sequencing dataset and removed the accessions with no  
351 measured phenotype and SNPs with minor allele frequency below 0.05 and a call-rate  
352 below 0.95. The final dataset includes 1001 individuals with 2,222,379 SNPs and measured  
353 flowering time at 10°C. To scan for candidate genes, we also downloaded the transcriptome  
354 dataset of a subset of this collection ( $n = 728$ ) (*Kawakatsu et al., 2016*). The final eQTL  
355 scan dataset contains RNA-seq derived RPKM-values for 24,150 genes in 648 accessions  
356 whose phenotypic and genotypic data are both available.

### 357 **Whole genome re-sequencing derived SNP genotype and RNA-sequencing** 358 **derived transcriptome data for a population of 144 natural *A. thaliana*** 359 **accessions**

360 In an earlier study, Schmitz et al. (*Schmitz et al., 2013*) RNA-sequenced a collection  
361 of 144 natural *A. thaliana* accessions. We downloaded this data together with their  
362 corresponding whole-genome SNP genotypes available as a part of the 1001 Genomes  
363 project (*1001 Genomes Consortium, 2016; Kawakatsu et al., 2016*) to replicate our SMR  
364 findings. Following the quality control procedure in (*Zan et al., 2016*), we removed two  
365 accessions from the data (Alst\_1 and Ws\_2) due to missing genotype data and two  
366 accessions (Ann\_1 and Got\_7) due to their low transcript call rate (16,861 and 18,693  
367 genes with transcripts as compared to the range of 22,574 to 26,967 for the other the  
368 accessions). The final dataset used for eQTL mapping included 1,347,036 SNPs with  
369 MAF above 0.05 and call-rate above 0.95 for 140 accessions, and corresponding RNA-seq



370 derived FPKM-values for 33,554 genes.

### 371 **Single-trait analysis for flowering time trait**

372 For all available traits in this dataset, we first performed a mixed model based single  
373 trait genome wide association analysis to generate single trait summaries statistics.  
374 Those summaries statistics were used as input for double trait analysis described in the  
375 following section. To replicate our signal, we also performed a single trait genome wide  
376 association analysis using a collection generated in 1001-genomes project (**1001 Genomes**  
377 **Consortium, 2016**). To correct for the population structure in these *A. thaliana* accessions,  
378 single-trait genome wide scan was performed based on linear mixed models, using the  
379 polygenic and mmscore procedure in GenABEL (**Aulchenko et al., 2007**).

### 380 **Double-trait genome-wide association analysis**

381 We performed double-trait genome scans using our recently developed multivariate  
382 analysis method implemented in the MultiABEL package (**Shen et al., 2017**). The method  
383 takes the whole-genome summary statistics to infer shrinkage phenotypic correlation  
384 coefficients and conducts MANOVA analysis. The shrinkage phenotypic correlation co-  
385 efficient of two traits can be unbiasedly estimated by the correlation of genome-wide  
386 Z-scores, which is proportional to the phenotypic correlation on the liability scale, with a  
387 shrinkage factor of the square root of sample overlapping proportion. Bivariate p-values  
388 are reported. In this way, the bivariate MANOVA analysis is carried out on the liability  
389 scale, on partially overlapping sample.

### 390 **eQTL and SMR analysis**

391 We screened for candidate genes by analyzing the expression data in a subset of the  
392 1001-genomes collection containing 140 accessions. Expression values for 19 genes  
393 around 20kb up/downstream of the top associated SNP were extracted from (**Schmitz**  
394 **et al., 2013**). 14 genes did not pass Kolmogorov-Smirnov test (ks test statistics < 0.8) were  
395 filtered out due to potential unreliable measurement mentioned in (**Zan et al., 2016**).  
396 The remaining five genes were subsequently passed onto eQTL mapping using qtscore  
397 procedure in GenABEL (**Aulchenko et al., 2007**). Output were reformatted according to  
398 the description in (**Zhu et al., 2016**). Together with the flowering time single-trait scan  
399 results (**1001 Genomes Consortium, 2016**), these were further passed onto SMR analysis  
400 scanning for association between individual gene expression and flowering time. The SMR  
401 analysis were repeated for 5 top candidates, in an independent gene expression dataset  
402 containing 648 accessions (**Kawakatsu et al., 2016**) following the same procedure.

## References

- 403  
404 **1001 Genomes Consortium.** 1,135 Genomes Reveal the Global Pattern of Polymorphism in  
405 *Arabidopsis thaliana*. *Cell*. 2016 Jul; 166(2):481–491.
- 406 **Alexander DH,** Novembre J, Lange K. Fast model-based estimation of ancestry in unrelated  
407 individuals. *Genome research*. 2009 Sep; 19(9):1655–1664.
- 408 **Atwell S,** Huang YS, Vilhjálmsson BJ, Willems G, Horton M, Li Y, Meng D, Platt A, Tarone AM, Hu TT,  
409 Jiang R, Mulyati NW, Zhang X, Amer MA, Baxter I, Brachi B, Chory J, Dean C, Debieu M, de Meaux  
410 J, et al. Genome-wide association study of 107 phenotypes in *Arabidopsis thaliana* inbred lines.  
411 *Nature*. 2010 Jun; 465(7298):627–631.
- 412 **Aulchenko YS,** Ripke S, Isaacs A, van Duijn CM. GenABEL: an R library for genome-wide association  
413 analysis. *Bioinformatics (Oxford, England)*. 2007 May; 23(10):1294–1296.
- 414 **Brachi B,** Faure N, Horton M, Flahauw E, Vazquez A, Nordborg M, Bergelson J, Cuguen J, Roux F.  
415 Linkage and association mapping of *Arabidopsis thaliana* flowering time in nature. *PLoS genetics*.  
416 2010 May; 6(5):e1000940.
- 417 **Burgess S,** Scott RA, Timpson NJ, Davey Smith G, Thompson SG, EPIC- InterAct Consortium. Using  
418 published data in Mendelian randomization: a blueprint for efficient identification of causal risk  
419 factors. *European journal of epidemiology*. 2015 Mar; 30:543.
- 420 **Crawley MJ.** *Plant Ecology*. John Wiley & Sons; 2009.
- 421 **Dittmar EL,** Oakley CG, Ågren J, Schemske DW. Flowering time QTL in natural populations of  
422 *Arabidopsis thaliana* and implications for their adaptive value. *Molecular ecology*. 2014 Sep;  
423 23(17):4291–4303.
- 424 **Hirschhorn JN,** Daly MJ. Genome-wide association studies for common diseases and complex  
425 traits. *Nature reviews Genetics*. 2005 Feb; 6(2):95–108.
- 426 **Huang X,** Wei X, Sang T, Zhao Q, Feng Q, Zhao Y, Li C, Zhu C, Lu T, Zhang Z, Li M, Fan D, Guo Y,  
427 Wang A, Wang L, Deng L, Li W, Lu Y, Weng Q, Liu K, et al. Genome-wide association studies of 14  
428 agronomic traits in rice landraces. *Nature genetics*. 2010 Nov; 42(11):961–967.
- 429 **Kawakatsu T,** Huang SSC, Jupe F, Sasaki E, Schmitz RJ, Urich MA, Castanon R, Nery JR, Barragan  
430 C, He Y, Chen H, Dubin M, Lee CR, Wang C, Bemm F, Becker C, O'Neil R, O'Malley RC, Quarless  
431 DX, 1001 Genomes Consortium, et al. Epigenomic Diversity in a Global Collection of *Arabidopsis*  
432 *thaliana* Accessions. *Cell*. 2016 Jul; 166(2):492–505.
- 433 **Korte A,** Farlow A. The advantages and limitations of trait analysis with GWAS: a review. *Plant*  
434 *methods*. 2013; 9:29.
- 435 **Schmitz RJ,** Schultz MD, Urich MA, Nery JR, Pelizzola M, Libiger O, Alix A, McCosh RB, Chen H, Schork  
436 NJ, Ecker JR. Patterns of population epigenomic diversity. *Nature*. 2013 Mar; 495(7440):193–198.

- 437 **Shen X**, De Jonge J, Forsberg SKG, Pettersson ME, Sheng Z, Hennig L, Carlborg O. Natural CMT2  
438 variation is associated with genome-wide methylation changes and temperature seasonality.  
439 PLoS genetics. 2014 Dec; 10(12):e1004842.
- 440 **Shen X**, Klarić L, Sharapov S, Mangino M, Ning Z, Wu D, Trbojević-Akmačić I, Pučić-Baković M, Rudan  
441 I, Polasek O, Hayward C, Spector TD, Wilson JF, Lauc G, Aulchenko YS. Multivariate discovery  
442 and replication of five novel loci associated with Immunoglobulin G N-glycosylation. Nature  
443 communications. 2017 Sep; 8(1):447.
- 444 **Shen X**, Pettersson M, Rönnegård L, Carlborg O. Inheritance beyond plain heritability: variance-  
445 controlling genes in *Arabidopsis thaliana*. PLoS genetics. 2012; 8(8):e1002839.
- 446 **Visscher PM**, Yang J. A plethora of pleiotropy across complex traits. Nature genetics. 2016 Jun;  
447 48(7):707–708.
- 448 **Wang B**, Li Z, Xu W, Feng X, Wan Q, Zan Y, Sheng S, Shen X. Bivariate genomic analysis identifies a  
449 hidden locus associated with bacteria hypersensitive response in *Arabidopsis thaliana*. Scientific  
450 reports. 2017 Mar; 7:45281.
- 451 **Wellenreuther M**, Hansson B. Detecting Polygenic Evolution: Problems, Pitfalls, and Promises.  
452 Trends in genetics : TIG. 2016 Mar; 32(3):155–164.
- 453 **Yang J**, Benyamin B, McEvoy BP, Gordon S, Henders AK, Nyholt DR, Madden PA, Heath AC, Martin  
454 NG, Montgomery GW, Goddard ME, Visscher PM. Common SNPs explain a large proportion of  
455 the heritability for human height. Nature genetics. 2010 Jul; 42(7):565–569.
- 456 **Yang J**, Zaitlen NA, Goddard ME, Visscher PM, Price AL. Advantages and pitfalls in the application of  
457 mixed-model association methods. Nature genetics. 2014 Feb; 46(2):100–106.
- 458 **Zan Y**, Shen X, Forsberg SKG, Carlborg O. Genetic Regulation of Transcriptional Variation in Natural  
459 *Arabidopsis thaliana* Accessions. G3 (Bethesda, Md). 2016; 6(8):2319–2328.
- 460 **Zhu Z**, Zhang F, Hu H, Bakshi A, Robinson MR, Powell JE, Montgomery GW, Goddard ME, Wray NR,  
461 Visscher PM, Yang J. Integration of summary data from GWAS and eQTL studies predicts complex  
462 trait gene targets. Nature genetics. 2016 May; 48(5):481–487.

463 Supplementary Table 1: Phenotypes included in the bivariate analyses.

464 Details about phenotyping can be referred to *Atwell et al. (2010)*.

| Phenotype         | Description                                                            | Number of Accessions |
|-------------------|------------------------------------------------------------------------|----------------------|
| LD                | Days to flowering time (FT) under Long Day (LD)                        | 167                  |
| LDV               | Days to flowering time (FT) under Long Day (LD) (5 wks vernalization)  | 168                  |
| SD                | Days to flowering time (FT) under Short Day (SD)                       | 162                  |
| SDV               | Days to flowering time (FT) under Short Day (SD) (5 wks vernalization) | 159                  |
| 0W                | Days to FT under LD without vernalization                              | 137                  |
| 2W                | Days to FT under LD with 2wks vernalization                            | 152                  |
| 4W                | Days to FT under LD with 4wks vernalization                            | 119                  |
| 8W                | Days to FT under LD with 8wks vernalization                            | 155                  |
| FLC               | FLC gene expression                                                    | 167                  |
| FRI               | FRI gene expression                                                    | 164                  |
| FT10              | Flowering time (FT), 10°C                                              | 194                  |
| FT16              | Flowering time (FT), 16°C                                              | 193                  |
| FT22              | Flowering time (FT), 22°C                                              | 193                  |
| LN10              | leaf number at flowering time (LN), 10°C                               | 177                  |
| LN16              | leaf number at flowering time (LN), 16°C                               | 176                  |
| LN22              | leaf number at flowering time (LN), 22°C                               | 176                  |
| 8W GH FT          | Days to FT with 8 wks vernalization                                    | 162                  |
| 8W GH LN          | LN at FT with 8 wks vernalization                                      | 163                  |
| 0W GH FT          | Days to FT without vernalization                                       | 153                  |
| 0W GH LN          | LN at FT without vernalization                                         | 135                  |
| FT Field          | Days to flowering of plants grown in the field                         | 180                  |
| FT Diameter Field | Plant diameter at flowering (field)                                    | 180                  |
| FT GH             | Days to flowering (greenhouse)                                         | 166                  |
| LES               | Presence or absence of lesioning                                       | 95                   |
| YEL               | Presence or absence of yellowing                                       | 95                   |
| LY                | Presence or absence of either lesioning or yellowing                   | 95                   |
| FW                | Fresh weight of plants                                                 | 95                   |
| DW                | Dry weight of plants                                                   | 95                   |
| Chlorosis 10      | Visual chlorosis presence, 10°C                                        | 177                  |
| Chlorosis 16      | Visual chlorosis presence, 16°C                                        | 176                  |
| Chlorosis 22      | Visual chlorosis presence, 22°C                                        | 176                  |

|                    |                                                                           |     |
|--------------------|---------------------------------------------------------------------------|-----|
| Anthocyanin 10     | Visual anthocyanin presence, 10°C                                         | 177 |
| Anthocyanin 16     | Visual anthocyanin presence, 16°C                                         | 176 |
| Anthocyanin 22     | Visual anthocyanin presence, 22°C                                         | 177 |
| Seed Dormancy      | Seed dormancy level                                                       | 83  |
| Germ 10            | Days to germination, 10°C                                                 | 177 |
| Germ 16            | Days to germination, 16°C                                                 | 176 |
| Germ 22            | Days to germination, 22°C                                                 | 177 |
| Seedling Growth    | Seedling growth rate                                                      | 100 |
| Vern Growth        | Vegetative growth rate during vernalization                               | 110 |
| After Vern Growth  | Vegetative growth rate after vernalization                                | 110 |
| Secondary Dormancy | Decrease in germination rate after prolonged exposure to cold temperature | 93  |
| Germ in dark       | Germination in the dark                                                   | 93  |
| DSDS50             | Duration of seed dry storage required for 50% of the seeds to germinate   | 109 |
| Seed bank 133-91   | Non-monotonous dynamic of dormancy release                                | 110 |
| Storage 7 days     | Primary dormancy, 7 days dry storage                                      | 110 |
| Storage 28 days    | Primary dormancy, 28 days dry storage                                     | 110 |
| Storage 56 days    | Primary dormancy, 56 days dry storage                                     | 110 |
| Hypocotyl length   | <sup>466</sup> Hypocotyl length                                           | 89  |
| Width 10           | Plant diameter, 10°C                                                      | 176 |
| Width 16           | Plant diameter, 16°C                                                      | 175 |
| Width 22           | Plant diameter, 22°C                                                      | 175 |
| Leaf serr 10       | Level of leaf serration, 10°C                                             | 174 |
| Leaf serr 16       | Level of leaf serration, 16°C                                             | 176 |
| Leaf serr 22       | Level of leaf serration, 22°C                                             | 176 |
| Leaf roll 10       | Leaf roll presence, 10°C                                                  | 177 |
| Leaf roll 16       | Leaf roll presence, 16°C                                                  | 176 |
| Leaf roll 22       | Leaf roll presence, 22°C                                                  | 176 |
| Rosette Erect 22   | Presence of rosette erectness, 22°C                                       | 176 |
| Silique 16         | Silique length, 16°C                                                      | 95  |
| Silique 22         | Silique length, 22°C                                                      | 95  |
| FT Duration GH     | Flowering period duration                                                 | 147 |
| LC Duration GH     | Life cycle period                                                         | 147 |
| LFS GH             | Last flower senescence                                                    | 148 |
| MT GH              | Maturation period                                                         | 147 |
| RP GH              | Reproduction period                                                       | 147 |

467

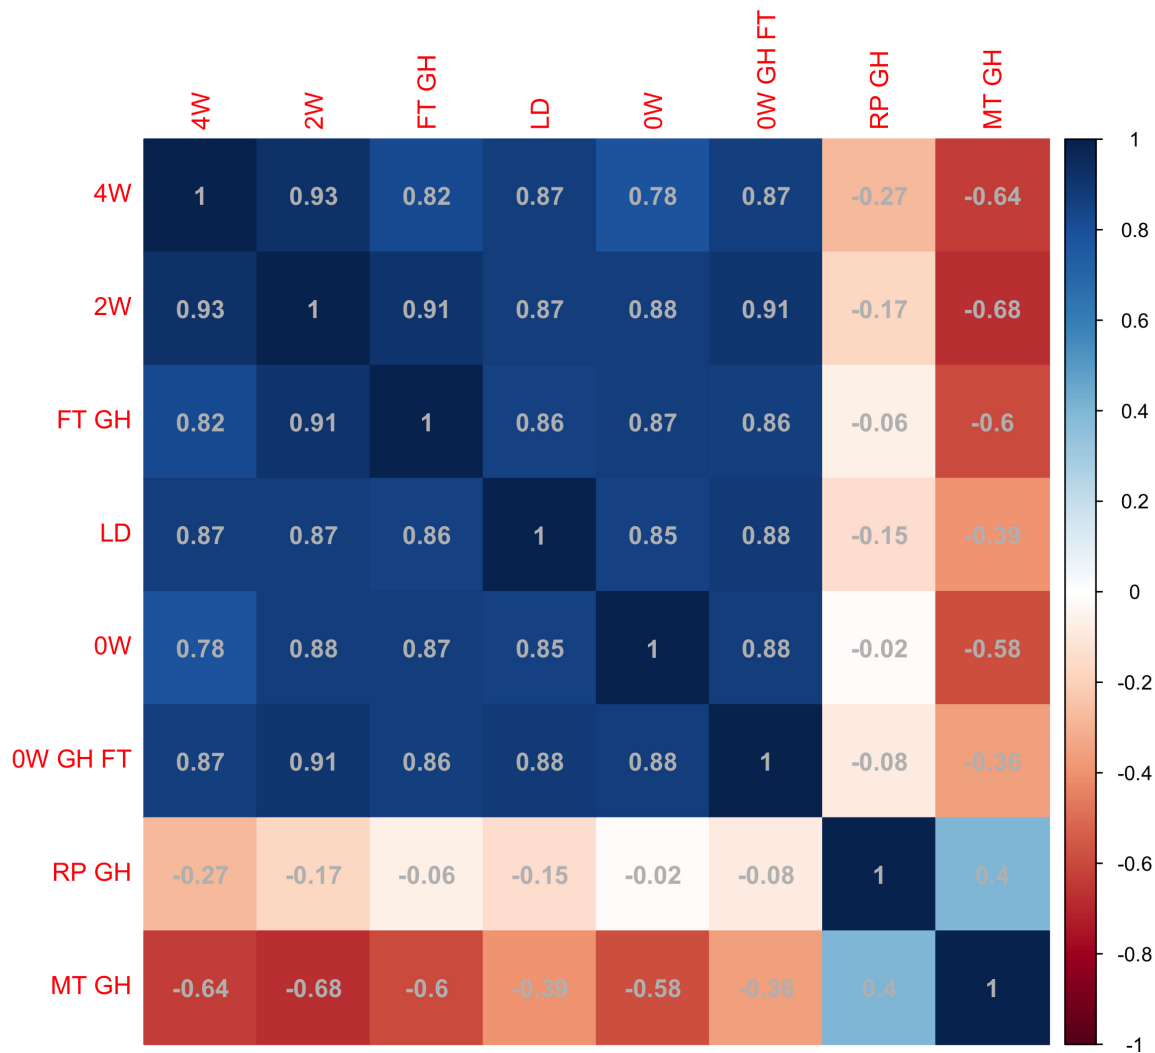

468 Supplementary Figure 1: Phenotypic correlations among flowering time  
 469 related traits, maturation period and reproduction period phenotypes.

470 The flowering time related traits are: 4W: Days to flowering time (FT) under long day (LD)  
 471 with vernalized for 4 wks at 5°C, 8hrs daylight; 2W: Days to flowering time (FT) under  
 472 long day (LD) with vernalized for 2 wks at 5°C, 8hrs daylight; FT GH: Days to flowering  
 473 (greenhouse); LD: Days to flowering time (FT) under Long Day (LD); OW: Days to flowering  
 474 time (FT) under Long Day (LD) without vernalization; OW GH FT: Days to flowering time  
 475 (FT).

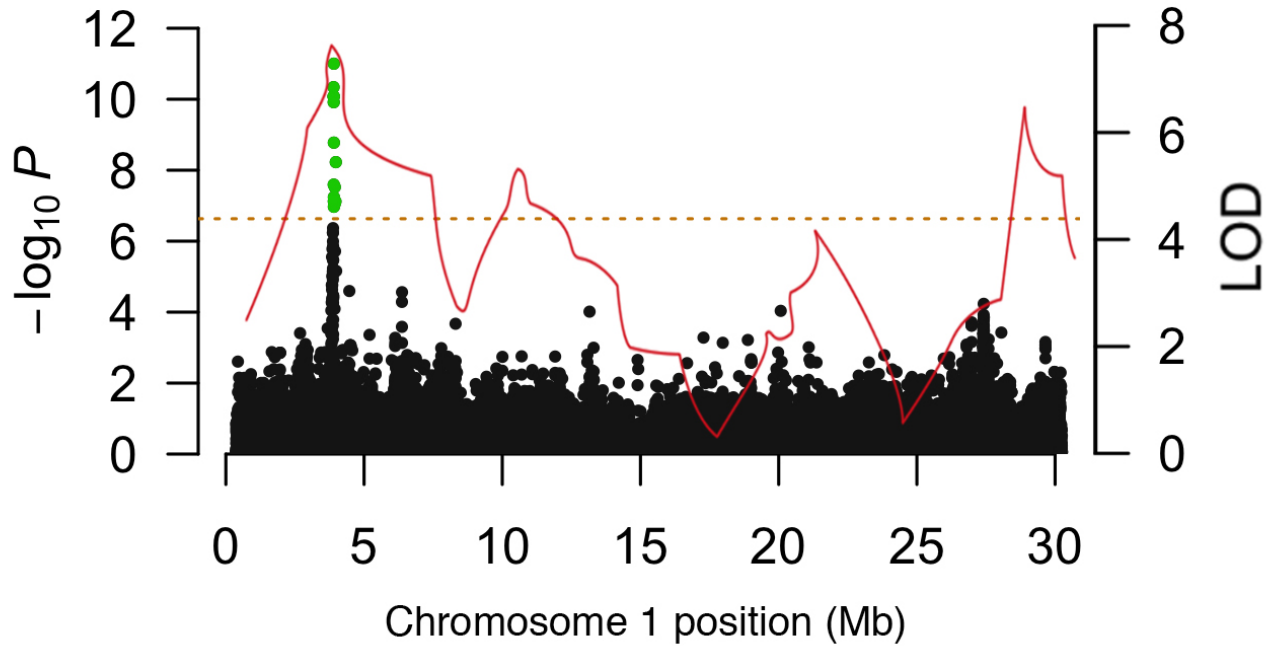

476 Supplementary Figure 2: Overlapping between QTL mapping and double-  
477 trait GWAS result.

478 The curve shows stepwise LOD profiles in chromosome 1 that are generated from a QTL  
479 mapping study using a cross between Italy and Sweden population analyzed by *Dittmar*  
480 *et al. (2014)* (reproduced by depicting the curvature of Figure 3a therein). The Manhattan  
481 plot shows chromosome 1 signal in our bivariate analysis.

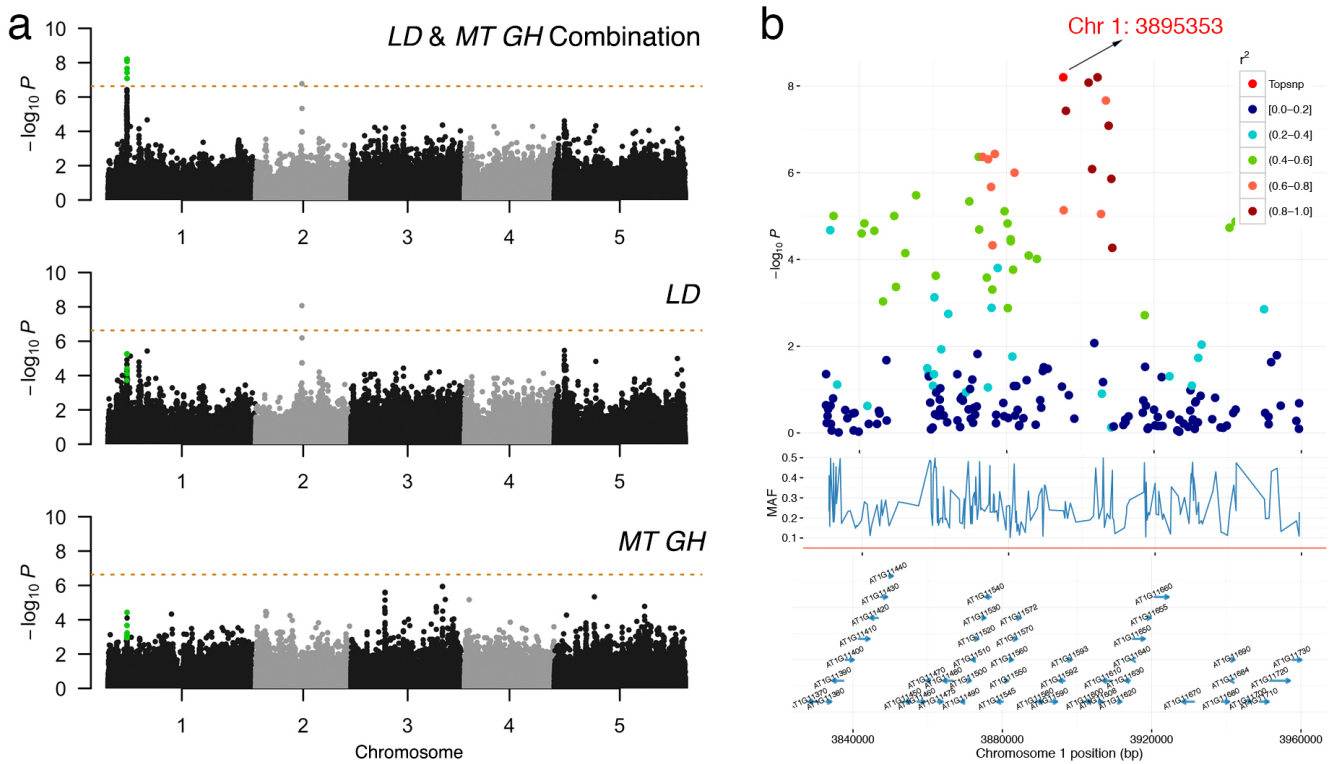

482 Supplementary Figure 3: Bivariate genome-wide association analysis of  
483 two developmental trait, LD: Days to flowering time (FT) under Long Day  
484 (LD), MT GH: Maturation period.

485 (a) Manhattan plots comparison of bivariate and univariate analysis results, where the  
486 novel variants only discoverable when combining two phenotypes are shown in green.  
487 The horizontal dashed line represents a 5% Bonferroni-corrected genome-wide significant  
488 threshold. (b) Zooming in the novel locus detected using bivariate analysis.  $r$ : linkage  
489 disequilibrium measured as correlation coefficient between the top variant and each  
490 variant in the region.



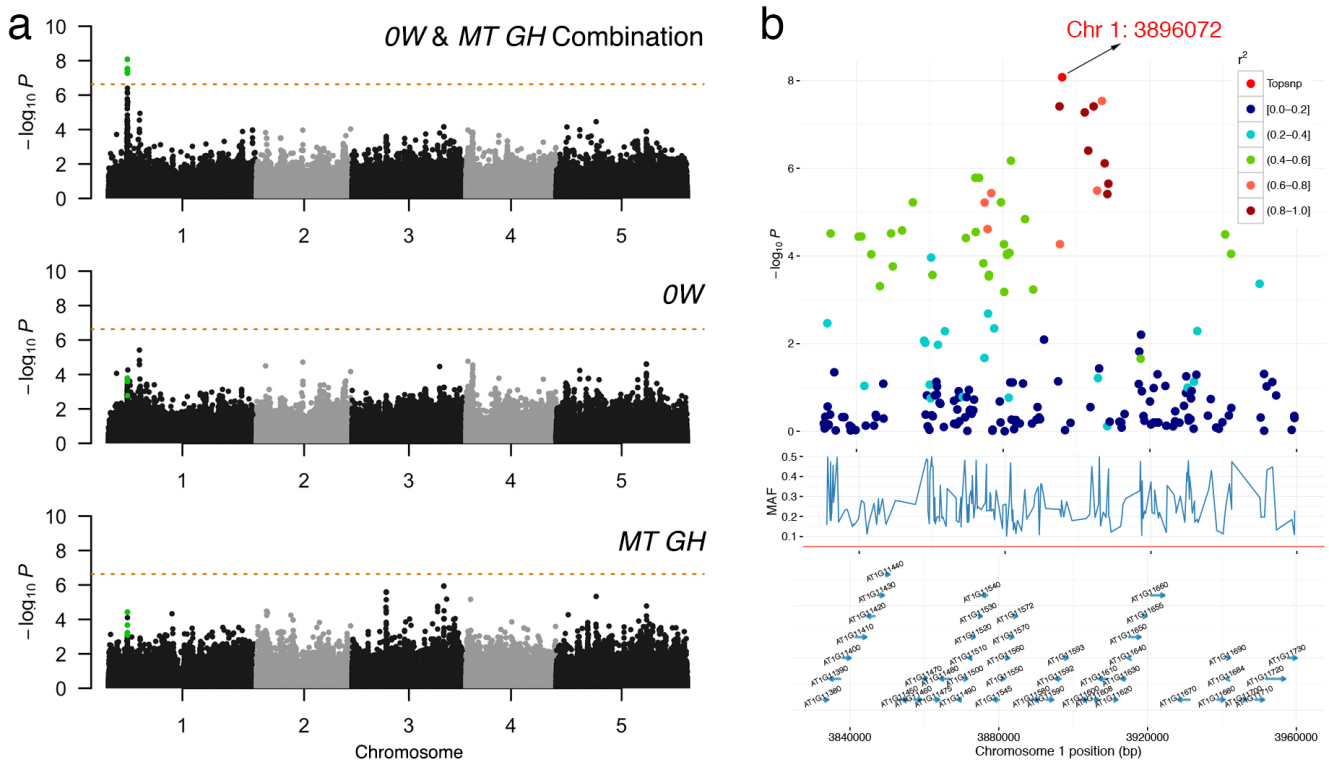

491 Supplementary Figure 4: Bivariate genome-wide association analysis of  
492 two developmental trait, OW: Days to flowering time (FT) under Long Day  
493 (LD) without vernalization, MT GH: Maturation period.

494 (a) Manhattan plots comparison of bivariate and univariate analysis results, where the  
495 novel variants only discoverable when combining two phenotypes are shown in green.  
496 The horizontal dashed line represents a 5% Bonferroni-corrected genome-wide significant  
497 threshold. (b) Zooming in the novel locus detected using bivariate analysis.  $r$ : linkage  
498 disequilibrium measured as correlation coefficient between the top variant and each  
499 variant in the region.

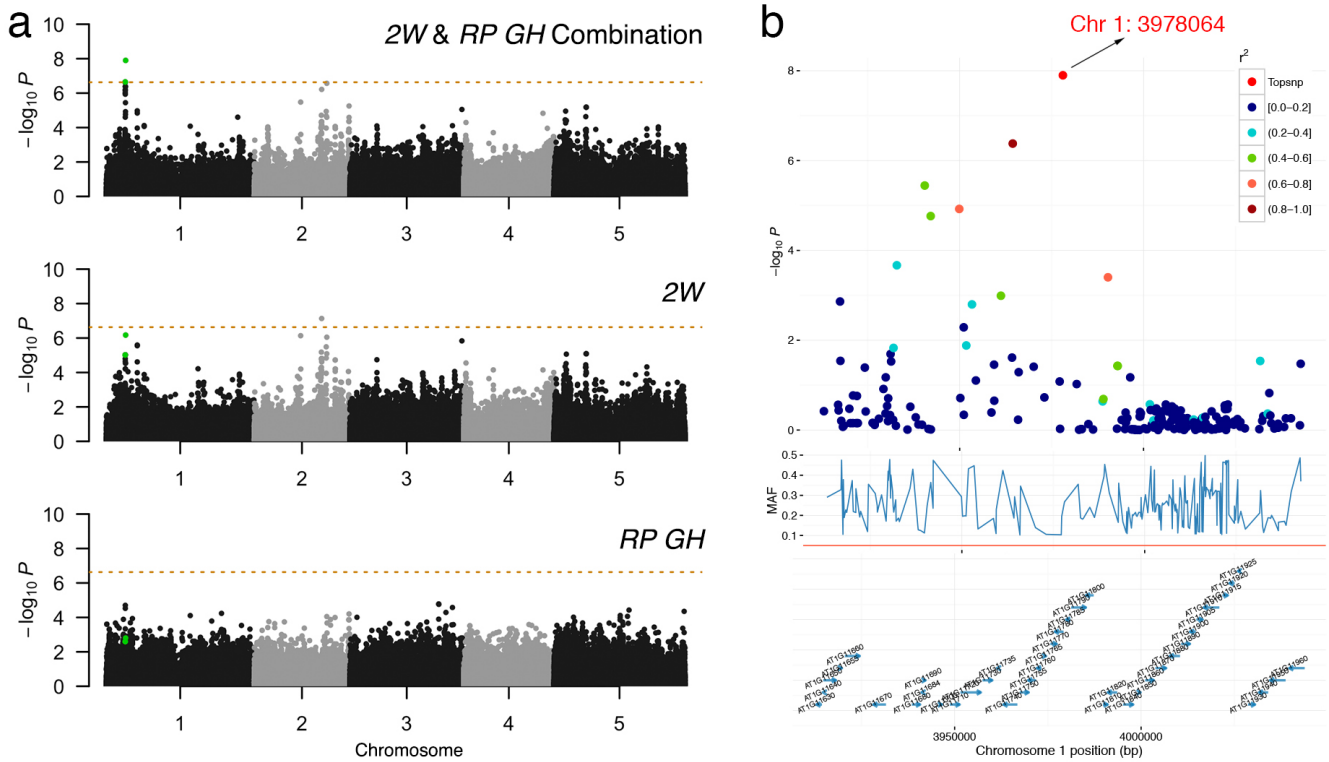

500 Supplementary Figure 5: Bivariate genome-wide association analysis of  
501 two developmental trait, 2W: Days to flowering time (FT) under long day  
502 (LD) with vernalized for 2 wks at 5°C, 8 hrs daylight, RP GH: Reproduction  
503 period.

504 (a) Manhattan plots comparison of bivariate and univariate analysis results, where the  
505 novel variants only discoverable when combining two phenotypes are shown in green.  
506 The horizontal dashed line represents a 5% Bonferroni-corrected genome-wide significant  
507 threshold. (b) Zooming in the novel locus detected using bivariate analysis.  $r$ : linkage  
508 disequilibrium measured as correlation coefficient between the top variant and each  
509 variant in the region.

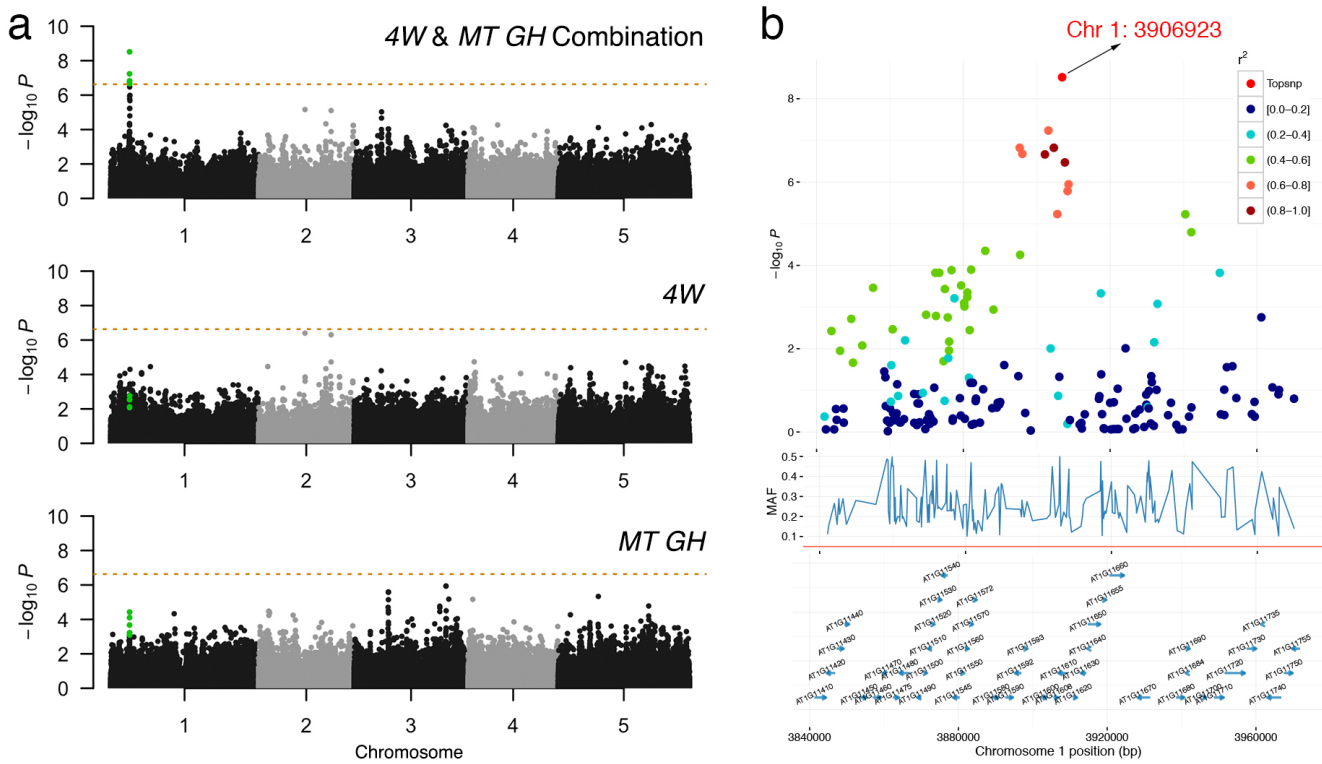

510 Supplementary Figure 6: Bivariate genome-wide association analysis of  
511 two developmental trait, 4W: Days to flowering time (FT) under long day  
512 (LD) with vernalized for 4 wks at 5°C, 8hrs daylight, MT GH: Maturation  
513 period.

514 (a) Manhattan plots comparison of bivariate and univariate analysis results, where the  
515 novel variants only discoverable when combining two phenotypes are shown in green.  
516 The horizontal dashed line represents a 5% Bonferroni-corrected genome-wide significant  
517 threshold. (b) Zooming in the novel locus detected using bivariate analysis.  $r$ : linkage  
518 disequilibrium measured as correlation coefficient between the top variant and each  
519 variant in the region.

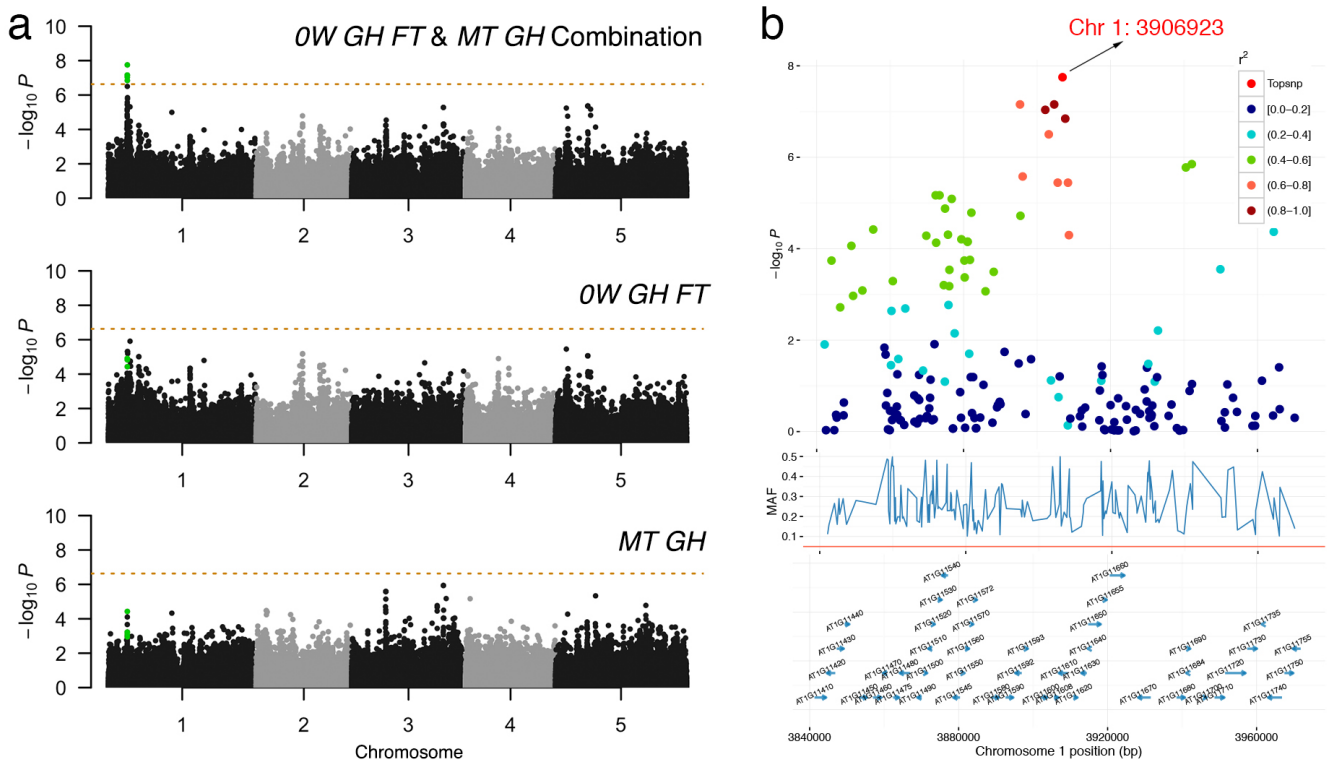

520 Supplementary Figure 7: Bivariate genome-wide association analysis of  
521 two developmental trait, 0W GH FT: Days to flowering: time (FT), MT GH:  
522 Maturation period.

523 (a) Manhattan plots comparison of bivariate and univariate analysis results, where the  
524 novel variants only discoverable when combining two phenotypes are shown in green.  
525 The horizontal dashed line represents a 5% Bonferroni-corrected genome-wide significant  
526 threshold. (b) Zooming in the novel locus detected using bivariate analysis.  $r$ : linkage  
527 disequilibrium measured as correlation coefficient between the top variant and each  
528 variant in the region.

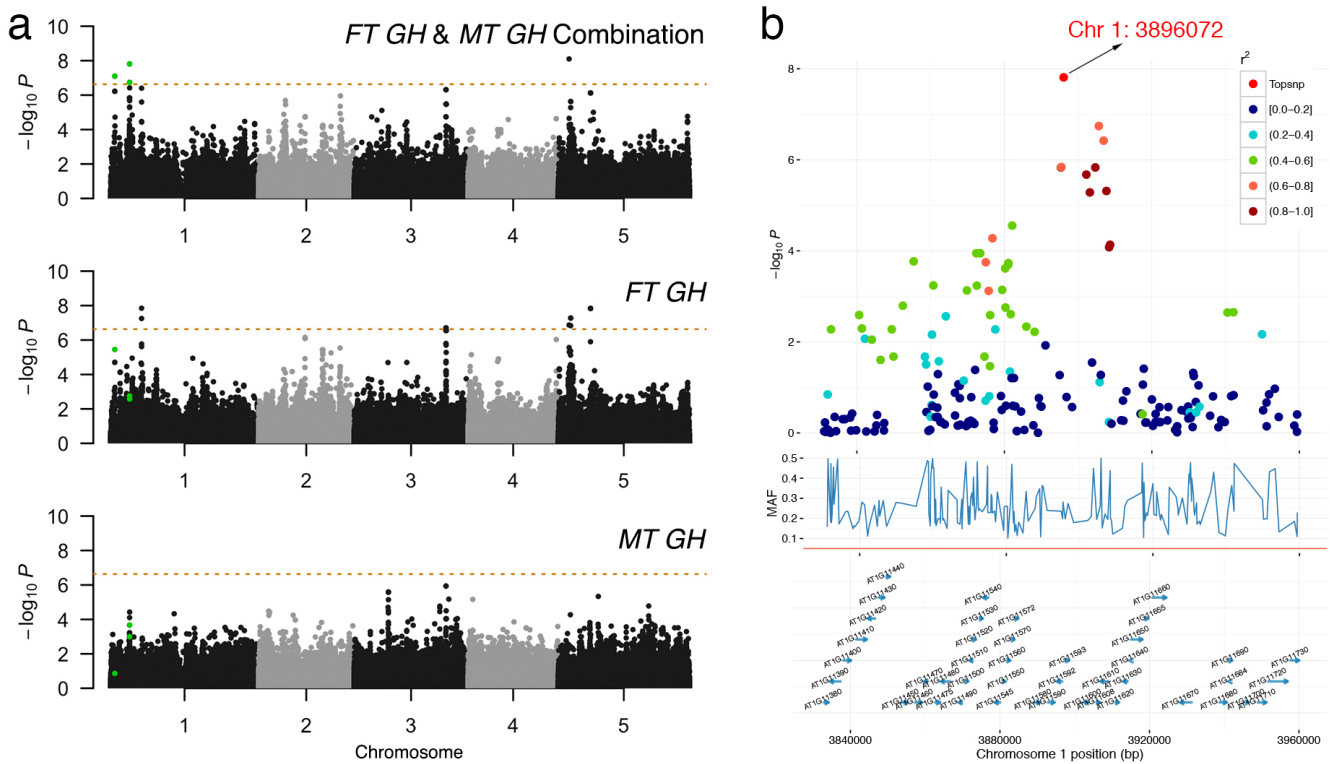

529 Supplementary Figure 8: Bivariate genome-wide association analysis of  
530 two developmental trait, FT GH: Days to flowering (greenhouse), MT GH:  
531 Maturation period.

532 (a) Manhattan plots comparison of bivariate and univariate analysis results, where the  
533 novel variants only discoverable when combining two phenotypes are shown in green.  
534 The horizontal dashed line represents a 5% Bonferroni-corrected genome-wide significant  
535 threshold. (b) Zooming in the novel locus detected using bivariate analysis.  $r$ : linkage  
536 disequilibrium measured as correlation coefficient between the top variant and each  
537 variant in the region.
